# Supplementary material for: Transcriptomic, proteomic and metabolic changes in Arabidopsis thaliana leaves after the onset of illumination
Source: PubMed Central journal article supplement (PMC4750186; doi:10.1186/s12870-016-0726-3), 2016-02-11
Supplement: 12870_2016_726_MOESM21_ESM.pdf [file 12870_2016_726_MOESM21_ESM.pdf]

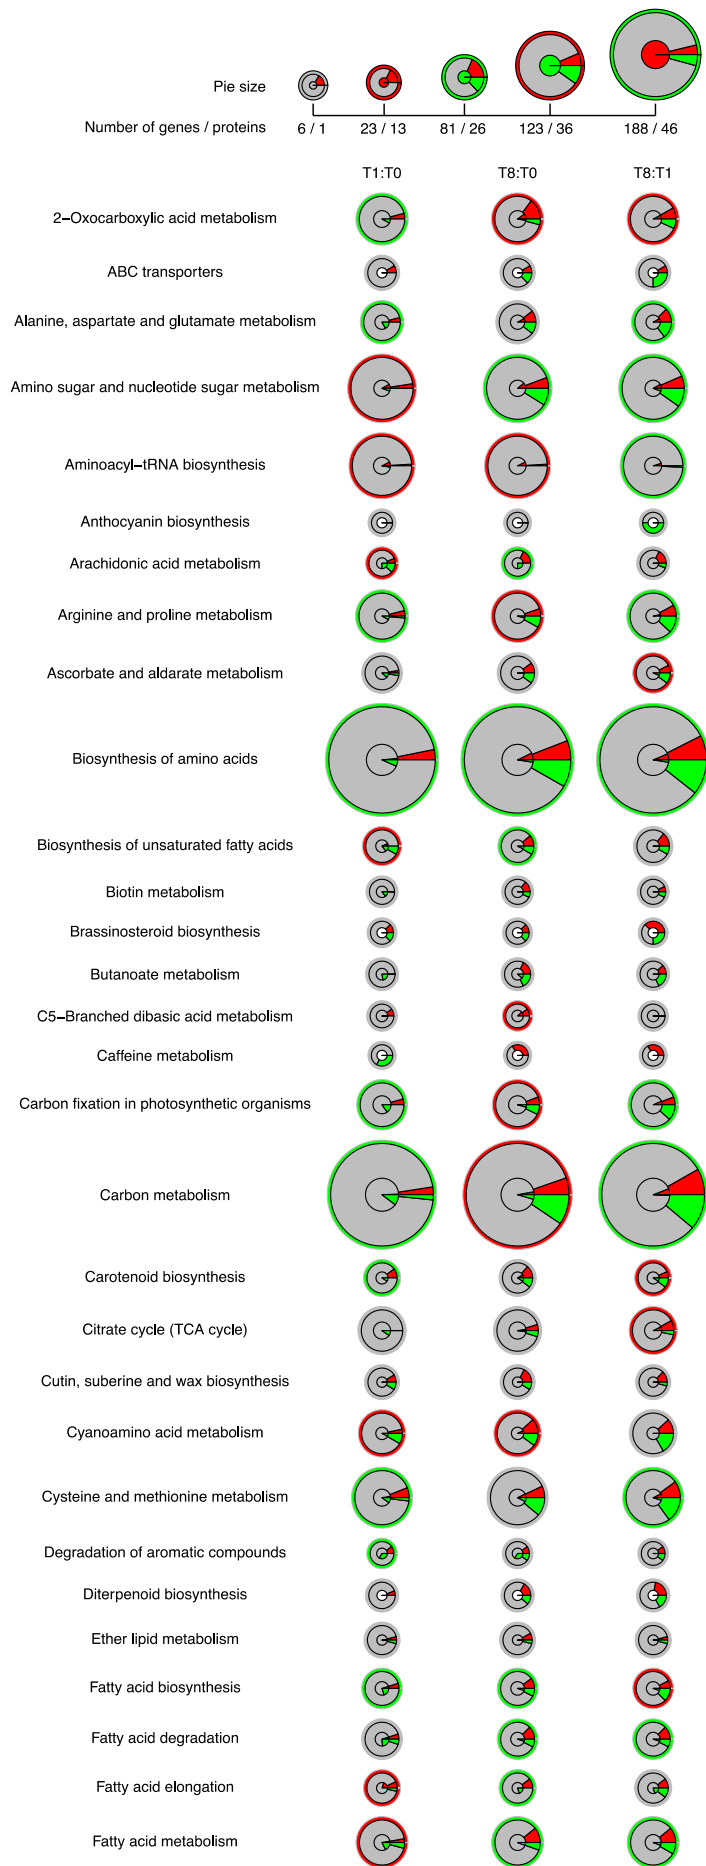

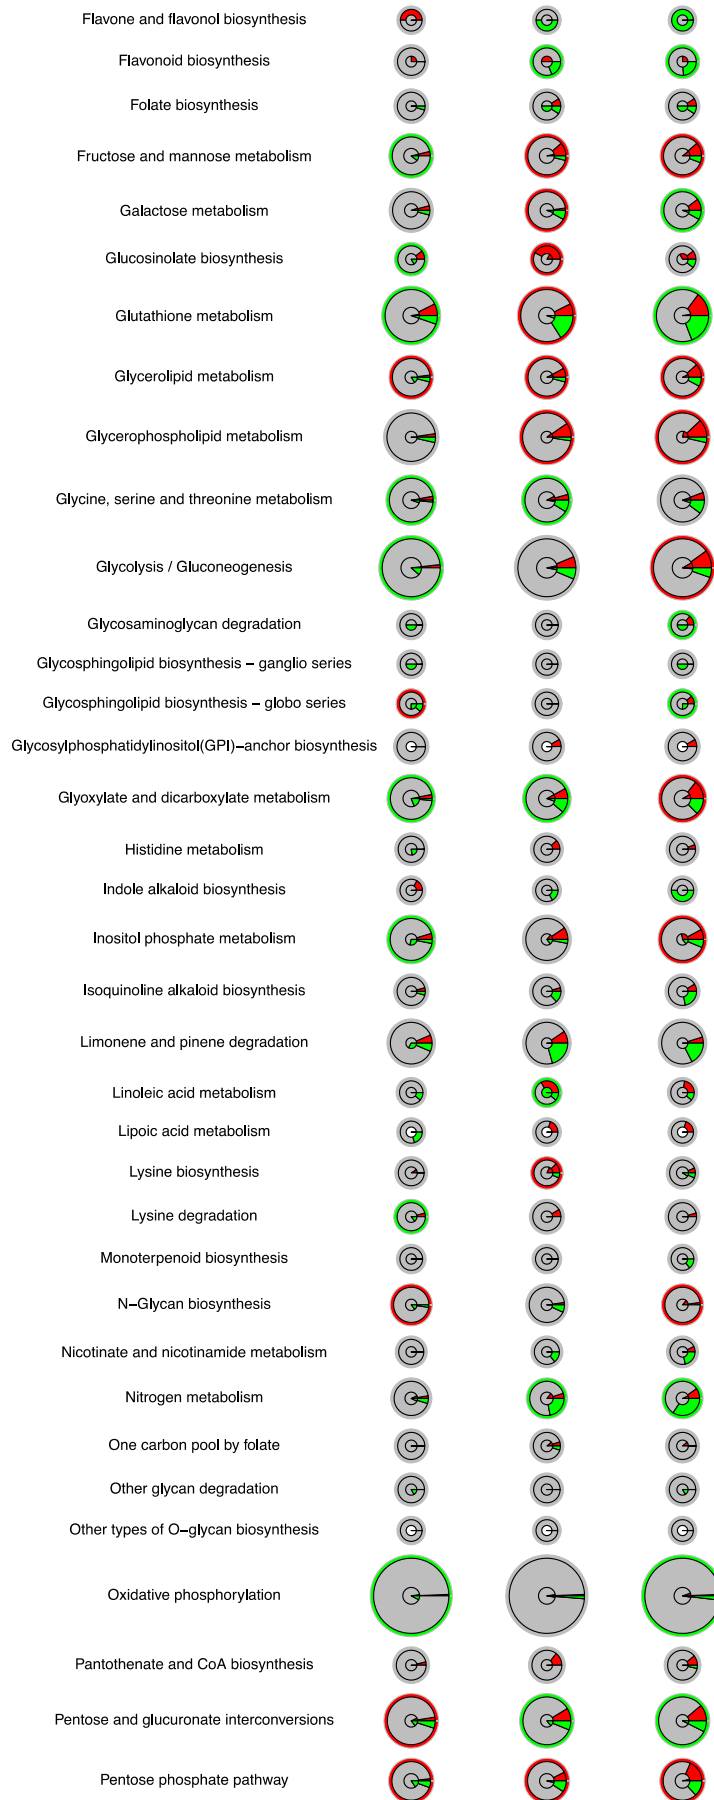

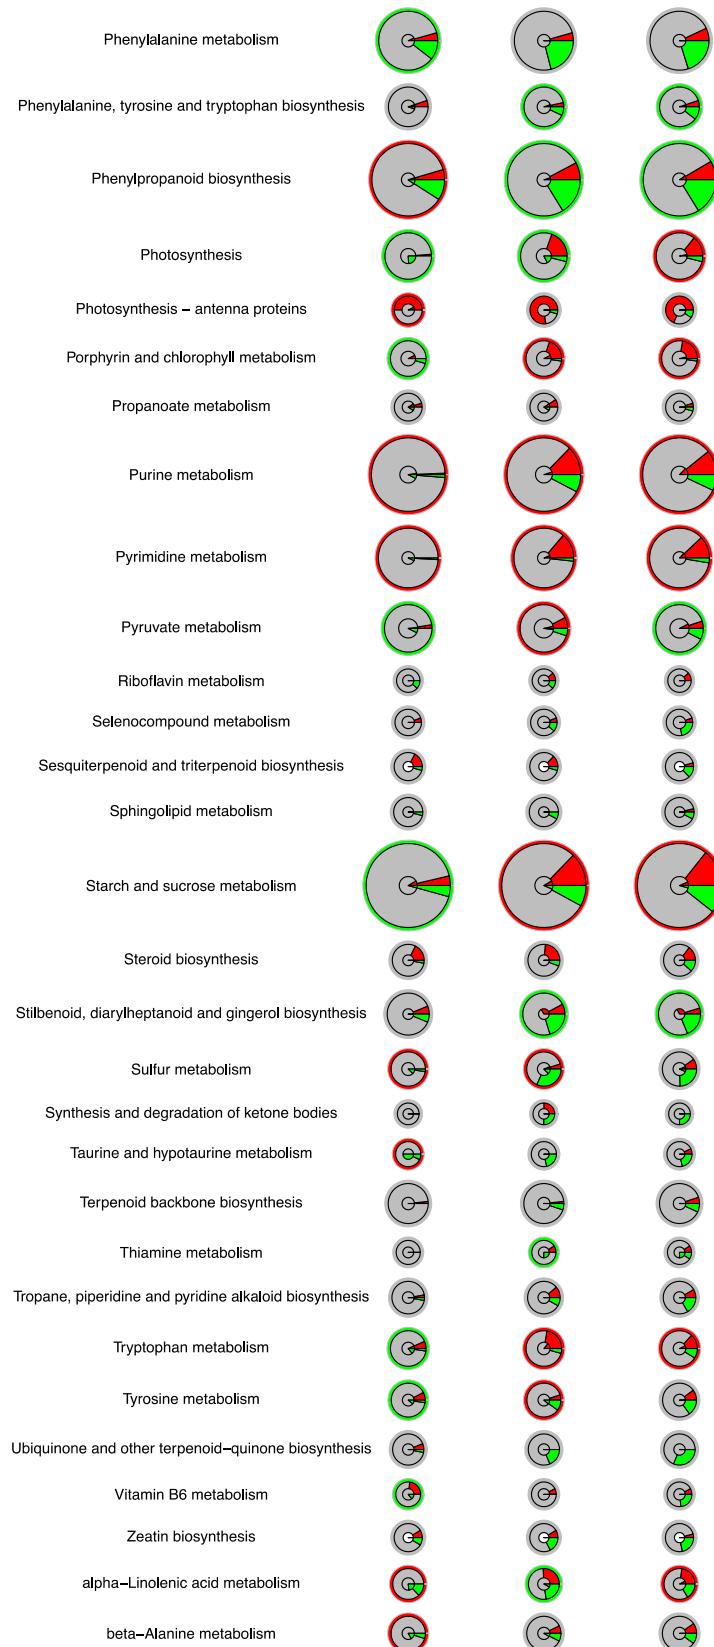

**Additional file 21. Correlation between RNA and protein at a pathway level.**

Three pairwise comparisons based on the T0, T1, T8 time points were included. (a)

The radius represents the volume (total number of genes) of the target pathway. (b)

Inner circle represents the ratio of up- and down-regulated proteins in the target pathway; gray: proteins not significantly differentially expressed; red: up-regulated proteins; green: down-regulated proteins; white: no protein detected. (c) The intermediate ring stands for ratio of up- or down-regulated genes; gray: genes not significantly differentially expressed; red: up-regulated genes; green: down-regulated genes. (d) The outer thin ring stands for the relationship between the ratios of up- and down-regulated genes and proteins in the target pathway; red: positive correlation, green: negative correlation.
